# Supplementary material
Source: PubMed Central journal article supplement (PMC5397722)

**A****Primary Tumor (Mastectomy)**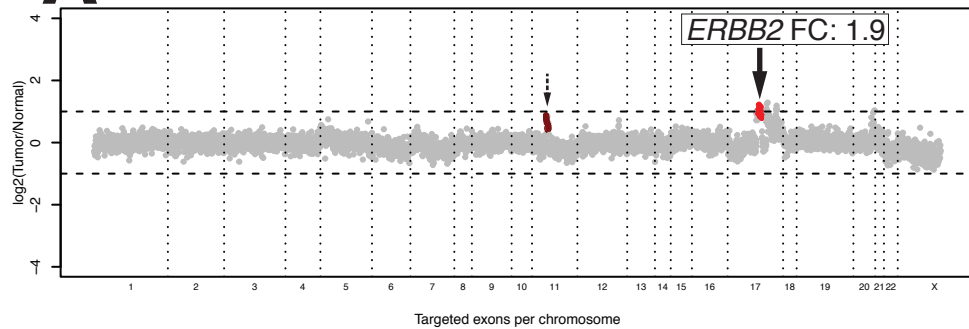**D****Metastasis (L3 Soft Tissue)**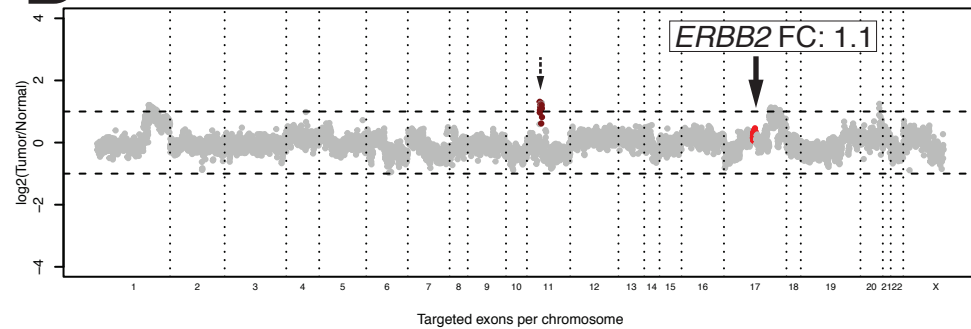**B**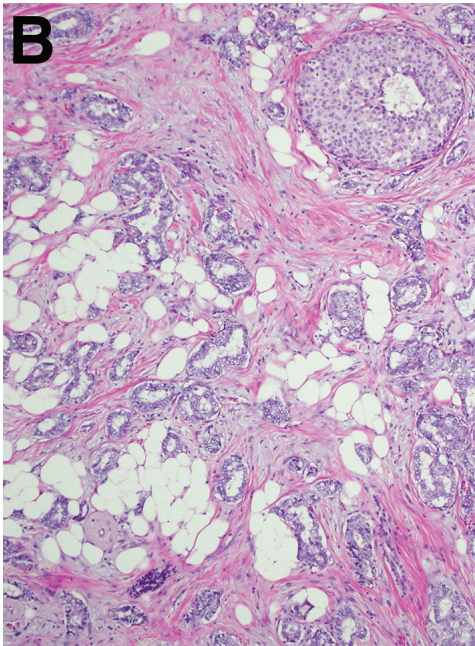**C**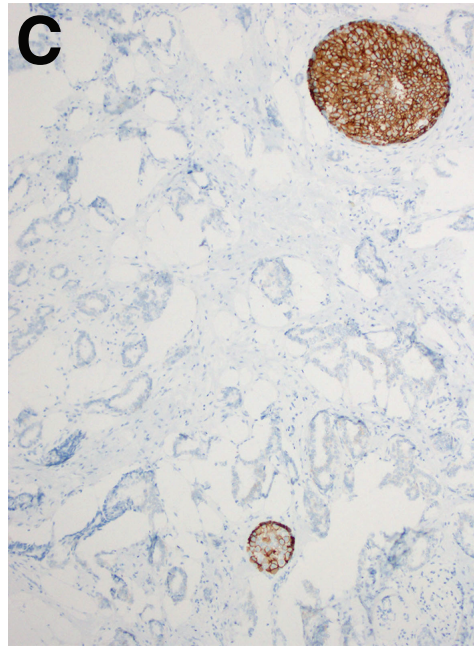**E**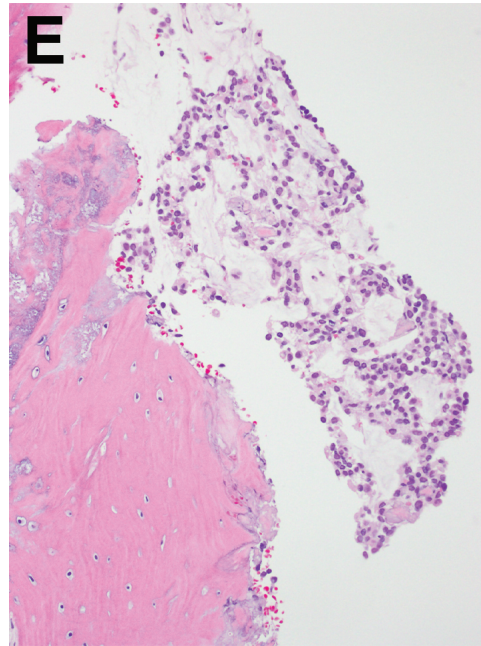**F**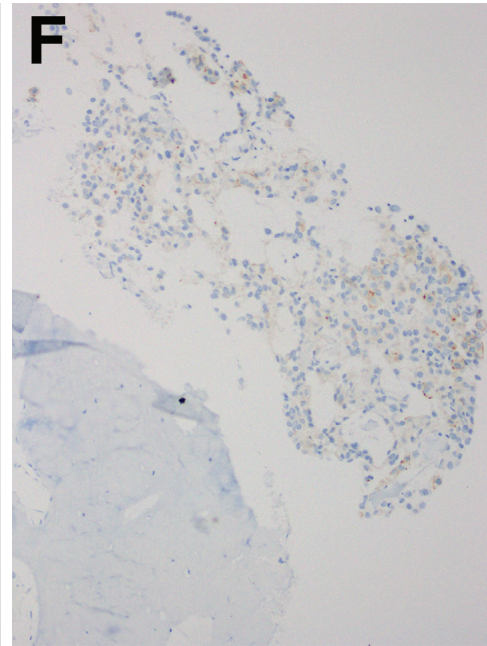

Supplement: mmc2.pdf [file mmc2.pdf]
